# Supplementary material for: Increased SBPase activity improves photosynthesis and grain yield in wheat grown in greenhouse conditions
Source: Philos Trans R Soc Lond B Biol Sci. 2017 Aug 14;372(1730):20160384. doi: 10.1098/rstb.2016.0384 (PMC5566882; doi:10.1098/rstb.2016.0384)
Supplement: Data file 1 [file rstb20160384supp2.csv]

	Date	line	plant	name	leaf	licor	Obs	Time	Photo	Cond	Ci	Trmmol	VpdL	Area	StmRat	BLCond	Tair	Tleaf	TBlk	CO2R	CO2S	H2OR	H2OS	RH_R	RH_S	Flow	PARi	PARo	Press	CsMch	HsMch	Status
1	17/6/2014	Sox23	5+	s35b.2.5+	flag	4	21	14205.4	25.3	0.439	270	4.75	1.22	4.5	1	3.5	22.96	25.32	21.93	398.69	378.34	16.246	19.74	59.21	71.95	599.7	2000	12	102.5	1.66	0.199	111115
2	17/6/2014	Sox23	5+	s35b.2.5+	flag	4	22	14357.6	20.8	0.476	200	4.87	1.16	4.5	1	3.5	22.7	25.11	21.75	299.08	282.47	16.299	19.881	60.34	73.6	599.6	2000	11	102.5	1.17	0.184	111115
3	17/6/2014	Sox23	5+	s35b.2.5+	flag	4	23	14497.8	13.7	0.525	138	5.12	1.12	4.5	1	3.5	22.8	25.02	21.96	199.28	188.27	16.356	20.121	60.21	74.06	599.7	1999	13	102.5	0.94	0.184	111115
4	17/6/2014	Sox23	5+	s35b.2.5+	flag	4	24	14619.1	5.1	0.558	76.9	5.3	1.1	4.5	1	3.5	22.79	25.02	21.95	99.2	94.99	16.409	20.309	60.44	74.8	599.7	1999	10	102.5	0.559	0.177	111115
5	17/6/2014	Sox23	5+	s35b.2.5+	flag	4	25	14723.3	0.512	0.583	46.5	5.41	1.08	4.5	1	3.5	22.8	24.98	21.96	49.51	48.93	16.459	20.437	60.58	75.22	599.3	1999	13	102.5	0.265	0.183	111115
6	17/6/2014	Sox23	5+	s35b.2.5+	flag	4	26	15109.7	30.8	0.654	283	5.72	1.04	4.5	1	3.5	23.06	24.92	22.35	400.62	375.91	16.563	20.763	59.98	75.19	599.7	1999	11	102.5	1.55	0.17	111115
7	17/6/2014	Sox23	5+	s35b.2.5+	flag	4	27	15308.8	43	0.717	494	6.07	1.02	4.5	1	3.5	23.25	24.98	22.54	650.69	615.66	16.573	21.032	59.33	75.3	600.2	2000	10	102.5	1.89	0.178	111115
8	17/6/2014	Sox23	5+	s35b.2.5+	flag	4	28	15556.9	47.1	0.777	734	6.4	1	4.5	1	3.5	23.43	25.05	22.74	901.43	861.93	16.604	21.301	58.83	75.48	599.7	1999	12	102.5	2.09	0.159	111115
9	17/6/2014	Sox23	5+	s35b.2.5+	flag	4	29	15802.1	47.6	0.814	1030	6.5	0.983	4.5	1	3.5	23.29	25	22.54	1199.67	1158.34	16.659	21.43	59.52	76.57	600	2000	11	102.5	2.24	0.156	111115
10	17/6/2014	Sox23	5+	s35b.2.5+	flag	4	30	16349.3	46.7	0.813	1330	6.45	0.976	4.5	1	3.5	23.29	24.99	22.54	1499.89	1457.77	16.75	21.487	59.82	76.74	599.7	2001	14	102.5	2.04	0.157	111115
11	17/6/2014	Sox23	3+	s35b.2.3+	flag	4	40	19644.8	26.5	0.588	287	5.01	1.01	5.1	1	3.24	22.66	24.95	21.76	399.86	375.75	16.936	21.112	62.87	78.37	599.5	2001	11	102.5	1.78	0.207	111115
12	17/6/2014	Sox23	3+	s35b.2.3+	flag	4	41	19796	20.8	0.615	215	5.17	0.999	5.1	1	3.24	22.92	24.99	22.16	301.11	282.18	16.965	21.268	61.95	77.66	599.5	2000	12	102.5	1.38	0.2	111115
13	17/6/2014	Sox23	3+	s35b.2.3+	flag	4	42	19919.2	13.1	0.635	146	5.24	0.985	5.1	1	3.24	22.82	24.97	21.96	199.25	187.31	17.003	21.362	62.51	78.53	599.8	2001	10	102.5	1.29	0.209	111115
14	17/6/2014	Sox23	3+	s35b.2.3+	flag	4	43	20044.3	4.86	0.658	79.2	5.37	0.98	5.1	1	3.24	22.94	25.03	22.16	99.01	94.45	17.041	21.507	62.16	78.45	599.9	2000	10	102.5	0.765	0.212	111115
15	17/6/2014	Sox23	3+	s35b.2.3+	flag	4	44	20147.4	0.304	0.674	46.9	5.43	0.972	5.1	1	3.24	22.96	25.03	22.15	48.94	48.45	17.067	21.588	62.19	78.67	599.6	2000	11	102.5	0.426	0.211	111115
16	17/6/2014	Sox23	3+	s35b.2.3+	flag	4	45	20396.6	27.9	0.705	295	5.54	0.955	5.1	1	3.24	23.08	24.99	22.35	400.11	374.63	17.079	21.688	61.78	78.45	599.8	1998	10	102.5	1.72	0.209	111115
17	17/6/2014	Sox23	3+	s35b.2.3+	flag	4	46	20598.7	37.5	0.743	511	5.69	0.94	5.1	1	3.24	23.1	24.98	22.34	651.1	616.22	17.077	21.813	61.7	78.81	599.7	1999	10	102.5	2.06	0.207	111115
18	17/6/2014	Sox23	3+	s35b.2.3+	flag	4	47	20827	40.3	0.778	751	5.88	0.935	5.1	1	3.24	23.26	25.02	22.54	901.02	862.48	17.065	21.947	61.04	78.51	600.5	2000	10	102.5	1.96	0.183	111115
19	17/6/2014	Sox23	3+	s35b.2.3+	flag	4	48	21115.1	40.7	0.809	1050	5.95	0.918	5.1	1	3.24	23.14	25	22.34	1200.57	1160.09	17.116	22.062	61.68	79.5	600.4	2000	9	102.5	2.23	0.195	111115
20	17/6/2014	Sox23	3+	s35b.2.3+	flag	4	49	21539.3	40.2	0.796	1340	5.93	0.925	5.1	1	3.24	23.11	25.02	22.35	1500.16	1458.7	17.116	22.04	61.77	79.54	600.5	2000	10	102.5	2.14	0.198	111115
21	18/6/2014	Sox23	7+	s35b.2.7+	flag	4	1	806.8	31.2	0.804	291	6.53	0.993	4.35	1	3.56	23.33	24.93	22.74	399.44	370.21	15.643	21.21	55.72	75.55	499.6	2000	11	102.5	1.58	0.126	111115
22	18/6/2014	Sox23	7+	s35b.2.7+	flag	4	2	950	24.3	0.825	216	6.6	0.983	4.35	1	3.56	23.46	24.95	22.93	299.15	276.34	15.713	21.339	55.56	75.45	499.2	1999	11	102.5	1.3	0.128	111115
23	18/6/2014	Sox23	7+	s35b.2.7+	flag	4	3	1108	15.8	0.842	147	6.65	0.974	4.35	1	3.56	23.46	24.97	22.93	200.16	185.38	15.798	21.456	55.83	75.83	500.3	1999	14	102.5	1.07	0.129	111115
24	18/6/2014	Sox23	7+	s35b.2.7+	flag	4	4	1237.2	5.93	0.858	78.8	6.67	0.964	4.35	1	3.56	23.46	24.98	22.92	99.09	93.39	15.903	21.581	56.21	76.28	500.3	2000	16	102.5	0.646	0.136	111115
25	18/6/2014	Sox23	7+	s35b.2.7+	flag	4	5	1353.5	0.231	0.866	46.2	6.69	0.958	4.35	1	3.56	23.46	24.99	22.93	47.93	47.46	15.965	21.655	56.43	76.54	500.3	2000	16	102.5	0.372	0.145	111115
26	18/6/2014	Sox23	7+	s35b.2.7+	flag	4	6	1632.7	31.7	0.862	294	6.68	0.96	4.35	1	3.56	23.73	25	23.32	399.34	369.64	15.977	21.657	55.56	75.31	500.6	2001	11	102.5	1.55	0.136	111115
27	18/6/2014	Sox23	7+	s35b.2.7+	flag	4	7	1891.9	41.5	0.867	510	6.69	0.957	4.35	1	3.56	23.63	24.99	23.13	650.61	610.97	15.966	21.659	55.86	75.78	500.3	1999	10	102.5	1.82	0.138	111115
28	18/6/2014	Sox23	7+	s35b.2.7+	flag	4	8	2118	43.1	0.879	751	6.75	0.955	4.35	1	3.56	23.75	25	23.32	900.12	857.6	15.96	21.703	55.43	75.37	500	2001	11	102.5	1.83	0.129	111115
29	18/6/2014	Sox23	7+	s35b.2.7+	flag	4	9	2472.1	44.4	0.902	1040	6.81	0.944	4.35	1	3.56	23.75	24.98	23.32	1200.91	1155.46	15.974	21.767	55.49	75.61	500.4	2000	9	102.5	1.62	0.128	111115
30	18/6/2014	Sox23	7+	s35b.2.7+	flag	4	10	4867.9	40.8	0.977	1250	7.12	0.926	4.35	1	3.56	23.78	25.03	23.32	1394.19	1350.35	15.989	22.046	55.43	76.43	500.2	2000	34	102.5	1.71	0.12	111125
31	18/6/2014	Sox23	1+	s35b.2.1+	flag	4	20	12644.7	33.4	1.09	300	6.97	0.84	4.65	1	3.43	23.69	25.04	23.12	400.32	366.8	16.582	22.918	57.79	79.88	499.5	1999	19	102.4	2.17	0.228	111115
32	18/6/2014	Sox23	1+	s35b.2.1+	flag	4	21	12769	25.7	1.08	222	6.98	0.844	4.65	1	3.43	23.58	25.09	22.94	298.68	272.99	16.62	22.966	58.31	80.57	499.5	1999	17	102.4	1.93	0.236	111115
33	18/6/2014	Sox23	1+	s35b.2.1+	flag	4	22	12884.2	16.9	1.1	150	6.98	0.835	4.65	1	3.43	23.54	25.07	22.94	200.03	183.11	16.659	23.007	58.57	80.89	499.5	2001	17	102.4	1.53	0.249	111115
34	18/6/2014	Sox23	1+	s35b.2.1+	flag	4	23	13002.2	6.05	1.11	80.4	7	0.834	4.65	1	3.43	23.55	25.08	22.93	98.93	92.71	16.698	23.056	58.69	81.05	500.3	1998	21	102.4	1.09	0.251	111115
35	18/6/2014	Sox23	1+	s35b.2.1+	flag	4	24	13153.4	0.588	1.11	46.6	6.93	0.826	4.65	1	3.43	23.28	25.05	22.53	49.15	48.3	16.764	23.066	59.87	82.38	499.7	1999	24	102.4	0.763	0.26	111115
36	18/6/2014	Sox23	1+	s35b.2.1+	flag	4	25	13486.6	33.1	1.09	301	6.86	0.824	4.65	1	3.43	23.41	25.03	22.74	400.05	366.87	16.822	23.058	59.63	81.73	499.5	2000	23	102.4	2.23	0.248	111115
37	18/6/2014	Sox23	1+	s35b.2.1+	flag	4	26	13716.7	43.2	1.1	518	6.87	0.82	4.65	1	3.43	23.41	25.02	22.74	649.06	605.03	16.832	23.078	59.64	81.77	499.6	2001	24	102.4	2.85	0.241	111115
38	18/6/2014	Sox23	1+	s35b.2.1+	flag	4	27	13921	45.6	1.1	757	6.91	0.824	4.65	1	3.43	23.55	25.07	22.94	899.81	851.85	16.851	23.132	59.22	81.3	499.6	2000	24	102.4	3.14	0.231	111115
39	18/6/2014	Sox23	1+	s35b.2.1+	flag	4	28	14168.3	46.2	1.12	1050	6.9	0.816	4.65	1	3.43	23.55	25.04	22.93	1199.35	1148.95	16.871	23.144	59.3	81.34	499.3	2000	19	102.4	3.02	0.233	111115
40	18/6/2014	Sox23	1+	s35b.2.1+	flag	4	29	14631.4	46.4	1.12	1350	6.82	0.806	4.65	1	3.43	23.27	24.96	22.53	1499.86	1447.44	16.903	23.107	60.43	82.6	499.3	2000	22	102.4	2.88	0.234	111115
41	18/6/2014	Sox23	8+	s35b.2.8+	flag	4	40	17521.2	28.2	0.796	298	5.76	0.891	4.8	1	3.37	22.36	25.03	21.36	399.77	370.62	16.995	22.401	64.17	84.58	500	2000	18	102.4	1.93	0.238	111115
42	18/6/2014	Sox23	8+	s35b.2.8+	flag	4	41	17643.4	22.3	0.822	220	5.79	0.873	4.8	1	3.37	22.43	24.95	21.57	298.9	276.02	16.998	22.424	63.92	84.33	500.5	1999	21	102.4	1.75	0.243	111115
43	18/6/2014	Sox23	8+	s35b.2.8+	flag	4	42	17760.6	14.4	0.827	148	5.83	0.875	4.8	1	3.37	22.54	24.98	21.76	199.03	184.19	16.996	22.461	63.47	83.88	500.6	1999	20	102.4	1.39	0.248	111115
44	18/6/2014	Sox23	8+	s35b.2.8+	flag	4	43	17876.9	5.24	0.83	79.8	5.85	0.875	4.8	1	3.37	22.55	25	21.76	98.77	93.22	17.027	22.507	63.57	84.04	500.4	2000	20	102.4	0.93	0.248	111115
45	18/6/2014	Sox23	8+	s35b.2.8+	flag	4	44	17983.1	0.37	0.829	45.8	5.85	0.876	4.8	1	3.37	22.56	25.02	21.76	47.89	47.27	17.04	22.522	63.59	84.05	500.4	2000	21	102.4	0.679	0.262	111115
46	18/6/2014	Sox23	8+	s35b.2.8+	flag	4	45	18276.3	27.9	0.812	300	5.8	0.884	4.8	1	3.37	22.72	25.04	21.96	400.2	371.37	17.058	22.497	63.04	83.14	500.4	2001	19	102.4	2.2	0.253	111115
47	18/6/2014	Sox23	8+	s35b.2.8+	flag	4	46	18511.4	36.1	0.818	519	5.79	0.877	4.8	1	3.37	22.72	25	21.96	649.81	611.74	17.061	22.486	63.04	83.09	500.4	1999	19	102.4	2.61	0.274	111115
48	18/6/2014	Sox23	8+	s35b.2.8+	flag	4	47	18720.5	37.6	0.841	762	5.87	0.869	4.8	1	3.37	22.72	25	21.93	900.6	859.77	17.058	22.553	63	83.3	500.8	2000	16	102.4	2.81	0.241	111115
49	18/6/2014	Sox23	8+	s35b.2.8+	flag	4	48	18946.6	37.7	0.828	1060	5.84	0.876	4.8	1	3.37	22.73	25	21.95	1201.48	1158.85	17.022	22.499	62.87	83.1	500.2	2000	17	102.4	2.84	0.234	111115
50	18/6/2014	Sox23	8+	s35b.2.8+	flag	4	49	19299.7	38.8	0.801	1340	5.76	0.887	4.8	1	3.37	22.58	25	21.76	1501.16	1455.85	16.971	22.372	63.24	83.37	500.3	1999	20	102.4	2.68	0.227	111115
51	19/6/2014	Sox23	6+	s35b.2.6+	flag	4	1	392.5	31.2	1.12	305	8.03	0.953	4.8	1	3.37	23.04	25.08	21.94	400.52	367.73	14.437	21.969	52.13	79.33	500.7	1999	28	102.1	2.34	0.188	111115
52	19/6/2014	Sox23	6+	s35b.2.6+	flag	4	2	522.6	24.9	1.1	225	7.96	0.954	4.8	1	3.37	22.86	25.05	21.75	300.88	274.91	14.444	21.913	52.71	79.97	500.5	1999	30	102	1.92	0.199	111115
53	19/6/2014	Sox23	6+	s35b.2.6+	flag	4	3	667.8	16.1	1.12	152	8	0.946	4.8	1	3.37	22.69	25.03	21.56	200.38	183.61	14.455	21.943	53.28	80.88	501.3	1999	29	102	1.54	0.207	111115
54	19/6/2014	Sox23	6+	s35b.2.6+	flag	4	4	777.9	5.91	1.13	80.7	8.01	0.941	4.8	1	3.37	22.67	25.02	21.57	99.09	92.71	14.464	21.982	53.41	81.17	500.2	1998	30	102.1	1.04	0.203	111115
55	19/6/2014	Sox23	6+	s35b.2.6+	flag	4	5	891.1	0.463	1.16	46.7	8.08	0.927	4.8	1	3.37	22.66	24.99	21.56	49.07	48.25	14.475	22.052	53.46	81.45	500.3	1999	29	102	0.736	0.215	111115
56	19/6/2014	Sox23	6+	s35b.2.6+	flag	4	6	1172.3	31.2	1.17	307	8.05	0.923	4.8	1	3.37	22.81	24.96	21.76	400.49	367.63	14.476	22.041	52.99	80.68	499.8	1999	22	102	2.43	0.206	111115
57	19/6/2014	Sox23	6+	s35b.2.6+	flag	4	7	1365.5	39.8	1.15	528	8.07	0.934	4.8	1	3.37	22.93	25.01	21.96	650.3	607.36	14.465	22.037	52.57	80.08	500.3	2000	26	102	2.78	0.19	111115
58	19/6/2014	Sox23	6+	s35b.2.6+	flag	4	8	1634.6	41.6	1.16	768	8.05	0.928	4.8	1	3.37	22.81	24.98	21.75	900.24	853.66	14.464	22.03	52.95	80.64	499.5	2001	25	102	3.25	0.201	111115
59	19/6/2014	Sox23	6+	s35b.2.6+	flag	4	9	1826.7	41.7	1.14	1060	8.05	0.939	4.8	1	3.37	22.93	25.04	21.95	1201.25	1152.28	14.472	22.039	52.6	80.1	499.5	2000	27	102	3.44	0.192	111115
60	19/6/2014	Sox23	6+	s35b.2.6+	flag	4	10	2057.8	42.5	1.12	1350	7.96	0.941	4.8	1	3.37	22.93	25.01	21.94	1502.09	1450.16	14.467	21.953	52.56	79.76	499.3	2000	15	102	3.07	0.187	111115
61	16/6/2014	Sox23	8+	s35b.3.8+	flag	4	30	17945.3	24.9	0.481	247	3.98	0.95	5.1	1	3.24	21.81	24.97	20.99	399.18	345.52	13.751	21.697	53.75	84.8	250.2	2002	16	102.5	1.84	0.185	111115
62	16/6/2014	Sox23	8+	s35b.3.8+	flag	4	31	18172.5	19.4	0.504	185	4.08	0.933	5.1	1	3.24	21.97	25.02	21.19	300.12	258.35	13.806	21.956	53.41	84.95	249.6	2000	11	102.5	1.56	0.175	111115
63	16/6/2014	Sox23	8+	s35b.3.8+	flag	4	32	18360.7	12.4	0.528	127	4.14	0.911	5.1	1	3.24	21.85	25	20.99	198.6	171.89	13.866	22.136	54.05	86.28	249.9	2000	10	102.5	1.39	0.186	111115
64	16/6/2014	Sox23	8+	s35b.3.8+	flag	4	33	18561.8	4.57	0.557	72.4	4.21	0.884	5.1	1	3.24	21.83	24.94	20.98	98.68	88.58	13.898	22.296	54.26	87.04	249.8	2000	15	102.5	1.14	0.194	111115
65	16/6/2014	Sox23	8+	s35b.3.8+	flag	4	34	18767	0.367	0.574	45.9	4.29	0.877	5.1	1	3.24	21.96	25.01	21.17	48.91	47.74	13.936	22.48	53.96	87.05	250	1999	15	102.5	0.87	0.218	111115
66	16/6/2014	Sox23	8+	s35b.3.8+	flag	4	35	19109.3	27.6	0.598	251	4.33	0.856	5.1	1	3.24	21.84	24.93	20.98	399.78	340.41	13.91	22.543	54.24	87.91	250	2000	16	102.5	2.33	0.237	111115
67	16/6/2014	Sox23	8+	s35b.3.8+	flag	4	36	19405.3	39.3	0.633	442	4.49	0.847	5.1	1	3.24	22.15	25.04	21.38	649.93	564.7	13.873	22.825	53.12	87.39	250	2000	12	102.5	3.11	0.28	111115
68	16/6/2014	Sox23	8+	s35b.3.8+	flag	4	37	19668.5	43.2	0.664	674	4.56	0.826	5.1	1	3.24	22.14	24.99	21.38	901.23	805.51	13.856	22.952	53.08	87.93	249.9	2000	13	102.5	3.94	0.363	111115
69	16/6/2014	Sox23	8+	s35b.3.8+	flag	4	38	20072.6	44.1	0.69	966	4.67	0.818	5.1	1	3.24	22.29	25.04	21.57	1200.75	1100.42	13.806	23.106	52.4	87.7	250.1	1999	11	102.5	5.23	0.457	111115
70	16/6/2014	Sox23	8+	s35b.3.8+	flag	4	39	20469.8	43.6	0.707	1260	4.71	0.81	5.1	1	3.24	22.29	25.02	21.58	1500.45	1398.13	13.765	23.144	52.26	87.87	250.4	2000	15	102.5	5.84	0.507	111115
71	16/6/2014	Sox23	9+	s35b.3.9+	flag	2	1	1838.5	33.3	0.765	281	7.85	1.26	4.8	1	3.37	24.7	25.16	24.55	399.48	370.51	12.94	19.1	42.39	62.57	600.2	2000	0	102.3	3.87	-0.282	111115
72	16/6/2014	Sox23	9+	s35b.3.9+	flag	2	2	2026.5	27.1	0.753	203	7.77	1.26	4.8	1	3.37	24.6	25.21	24.35	299.47	276.1	13.066	19.157	43.06	63.13	600.2	1999	1	102.3	3.55	-0.324	111115
73	16/6/2014	Sox23	9+	s35b.3.9+	flag	2	3	2222.5	18.6	0.748	133	7.68	1.25	4.8	1	3.37	24.46	25.17	24.16	199.44	183.45	13.146	19.17	43.68	63.7	600.2	2000	0	102.3	3.31	-0.369	111115
74	16/6/2014	Sox23	9+	s35b.3.9+	flag	2	4	2442.3	9.02	0.75	71	7.66	1.25	4.8	1	3.37	24.46	25.17	24.16	103.36	95.56	13.22	19.223	43.95	63.9	600.4	2001	0	102.3	2.82	-0.387	111115
75	16/6/2014	Sox23	9+	s35b.3.9+	flag	2	5	2940.5	2.75	0.744	37.2	7.59	1.24	4.8	1	3.37	24.46	25.21	24.15	47.51	45.04	13.377	19.327	44.45	64.22	600.3	2000	0	102.3	2.46	-0.401	111115
76	16/6/2014	Sox23	9+	s35b.3.9+	flag	2	6	3391.3	32.8	0.737	280	7.44	1.23	4.8	1	3.37	24.33	25.09	23.94	398.91	370.45	13.405	19.242	44.92	64.48	600.3	2000	0	102.3	3.65	-0.348	111115
77	16/6/2014	Sox23	9+	s35b.3.9+	flag	2	7	3588.5	40.8	0.738	498	7.44	1.23	4.8	1	3.37	24.32	25.09	23.97	650.11	613.83	13.427	19.26	45	64.55	600.4	2001	0	102.3	3.64	-0.311	111115
78	16/6/2014	Sox23	9+	s35b.3.9+	flag	2	8	3814.5	43.4	0.743	733	7.42	1.22	4.8	1	3.37	24.41	25.04	24.15	899.31	859.54	13.445	19.267	44.82	64.23	600.3	2001	0	102.3	2.87	-0.285	111115
79	16/6/2014	Sox23	9+	s35b.3.9+	flag	2	9	4057.8	43.4	0.739	1020	7.43	1.22	4.8	1	3.37	24.45	25.07	24.15	1198.29	1156.69	13.42	19.245	44.64	64.01	600.4	2001	0	102.3	1.94	-0.236	111115
80	16/6/2014	Sox23	9+	s35b.3.9+	flag	2	10	4285.5	43.8	0.734	1320	7.47	1.24	4.8	1	3.37	24.6	25.14	24.34	1500.22	1456.49	13.391	19.252	44.15	63.48	600.2	2000	0	102.3	-0.195	-0.194	111115
81	16/6/2014	Sox23	9+	s35b.3.9+	flag	2	11	6468.5	29.6	0.396	213	4.24	1.19	4.8	1	3.37	23.73	25.09	23.38	399.39	349.69	12.965	19.597	45.03	68.06	300.6	2000	1	102.3	2.96	-0.583	111115
82	16/6/2014	Sox23	9+	s35b.3.9+	flag	2	12	6638.8	23.1	0.417	159	4.38	1.18	4.8	1	3.37	23.77	25.13	23.37	299.18	260.47	12.975	19.827	44.94	68.68	300.6	1999	1	102.3	2.82	-0.604	111115
83	16/6/2014	Sox23	9+	s35b.3.9+	flag	2	13	6866	15.7	0.431	106	4.44	1.16	4.8	1	3.37	23.68	25.1	23.18	199.44	173.06	12.998	19.943	45.28	69.47	300.5	2001	0	102.3	2.53	-0.676	111115
84	16/6/2014	Sox23	9+	s35b.3.9+	flag	2	14	7161.5	7.5	0.45	58.1	4.59	1.15	4.8	1	3.37	23.82	25.22	23.37	101.75	89.12	13.05	20.225	45.06	69.84	300.6	1999	0	102.3	2.22	-0.689	111115
85	16/6/2014	Sox23	9+	s35b.3.9+	flag	2	15	7434.5	1.73	0.45	27.4	4.52	1.13	4.8	1	3.37	23.56	25.11	22.97	37.83	34.81	13.126	20.192	46.06	70.85	300.7	2000	0	102.3	1.85	-0.743	111115
86	16/6/2014	Sox23	9+	s35b.3.9+	flag	2	16	7810.5	31.7	0.471	222	4.63	1.12	4.8	1	3.37	23.72	25.13	23.18	400.85	347.68	13.17	20.409	45.77	70.93	300.6	1998	2	102.3	3.15	-0.65	111115
87	16/6/2014	Sox23	9+	s35b.3.9+	flag	2	17	8021.3	42.6	0.49	413	4.71	1.1	4.8	1	3.37	23.81	25.08	23.38	650.2	577.79	13.155	20.518	45.46	70.9	300.5	1999	0	102.3	3.16	-0.6	111115
88	16/6/2014	Sox23	9+	s35b.3.9+	flag	2	18	8259.3	46.9	0.509	641	4.83	1.09	4.8	1	3.37	23.94	25.11	23.57	900.94	819.66	13.109	20.656	44.95	70.83	300.6	1999	0	102.3	2.57	-0.552	111115
89	16/6/2014	Sox23	9+	s35b.3.9+	flag	2	19	8588.3	49	0.517	924	4.86	1.08	4.8	1	3.37	23.75	25.1	23.19	1200.13	1113.24	13.102	20.704	45.43	71.78	300.5	2001	0	102.3	1.25	-0.549	111115
90	16/6/2014	Sox23	9+	s35b.3.9+	flag	2	20	8850.5	48.1	0.53	1230	4.95	1.08	4.8	1	3.37	23.96	25.13	23.57	1500.21	1412.23	13.057	20.797	44.71	71.22	300.4	2000	0	102.3	-0.348	-0.47	111115
91	16/6/2014	Sox23	10+	s35b.3.10+	flag	2	21	10100.5	30.8	0.528	237	4.97	1.09	4.8	1	3.37	24.08	25.06	23.76	399.57	347.44	12.769	20.571	43.41	69.94	299.6	2000	0	102.3	3.5	-0.549	111115
92	16/6/2014	Sox23	10+	s35b.3.10+	flag	2	22	10238.8	23.9	0.527	172	4.98	1.09	4.8	1	3.37	23.98	25.09	23.57	298.59	258.24	12.78	20.592	43.72	70.45	300	1999	2	102.3	3.45	-0.586	111115
93	16/6/2014	Sox23	10+	s35b.3.10+	flag	2	23	10484.3	16.1	0.542	116	5.07	1.08	4.8	1	3.37	24.07	25.12	23.77	199.52	172.25	12.771	20.722	43.45	70.49	299.5	2001	0	102.3	3.19	-0.602	111115
94	16/6/2014	Sox23	10+	s35b.3.10+	flag	2	24	10728.3	7.47	0.552	63.1	5.13	1.08	4.8	1	3.37	24.1	25.15	23.76	101.74	89.05	12.768	20.817	43.35	70.67	299.7	2000	0	102.3	2.78	-0.643	111115
95	16/6/2014	Sox23	10+	s35b.3.10+	flag	2	25	11343.5	3.04	0.544	35.2	5.07	1.08	4.8	1	3.37	23.79	25.15	23.18	51.28	46.03	12.861	20.818	44.49	72.02	299.7	2000	0	102.3	2.19	-0.712	111115
96	16/6/2014	Sox23	10+	s35b.3.10+	flag	2	26	11735.5	30.6	0.552	242	5.07	1.07	4.8	1	3.37	23.91	25.15	23.37	400.01	348.08	12.988	20.949	44.61	71.95	299.6	1999	0	102.3	3.51	-0.64	111115
97	16/6/2014	Sox23	10+	s35b.3.10+	flag	2	27	11939.5	40.7	0.549	436	5.02	1.06	4.8	1	3.37	23.78	25.11	23.18	649.91	580.09	13.051	20.924	45.17	72.41	299.7	1999	0	102.3	3.46	-0.643	111115
98	16/6/2014	Sox23	10+	s35b.3.10+	flag	2	28	12181.5	44.2	0.555	664	5.04	1.05	4.8	1	3.37	23.79	25.14	23.18	899.2	821.67	13.116	21.027	45.37	72.74	299.5	2001	1	102.3	2.91	-0.635	111115
99	16/6/2014	Sox23	10+	s35b.3.10+	flag	2	29	12453.5	46	0.571	954	5.11	1.04	4.8	1	3.37	23.95	25.16	23.17	1200.82	1118.02	13.191	21.199	45.19	72.62	299.7	1999	0	102.3	1.6	-0.586	111115
100	16/6/2014	Sox23	10+	s35b.3.10+	flag	2	30	12786.8	46.6	0.558	1240	5.01	1.04	4.8	1	3.37	23.67	25.14	22.99	1500.59	1414.48	13.281	21.153	46.26	73.67	299	1999	0	102.3	-0.158	-0.599	111115
140	17/6/2014	WT	6c	s36.2.6c	flag	4	31	16924.5	22.6	0.375	269	3.93	1.16	4.5	1	3.5	21.75	24.98	20.59	398.62	380.53	16.816	19.704	65.95	77.27	599.8	2001	13	102.5	1.7	0.212	111115
141	17/6/2014	WT	6c	s36.2.6c	flag	4	32	17076.6	18	0.418	204	4.17	1.12	4.5	1	3.5	21.96	24.9	20.98	298.14	283.79	16.866	19.933	65.32	77.2	599.9	2001	11	102.5	1.35	0.207	111115
142	17/6/2014	WT	6c	s36.2.6c	flag	4	33	17188.7	12	0.45	138	4.37	1.1	4.5	1	3.5	22.09	24.89	21.18	198.42	188.76	16.897	20.114	64.93	77.29	599.6	2000	12	102.5	0.971	0.203	111115
143	17/6/2014	WT	6c	s36.2.6c	flag	4	34	17312	4.34	0.472	77.3	4.53	1.09	4.5	1	3.5	22.12	24.92	21.18	98.71	95.13	16.926	20.259	64.92	77.7	599.6	2000	13	102.5	0.614	0.211	111115
144	17/6/2014	WT	6c	s36.2.6c	flag	4	35	17406.1	0.381	0.487	46.3	4.65	1.09	4.5	1	3.5	22.23	24.96	21.37	49	48.54	16.952	20.369	64.58	77.59	599.3	1999	13	102.5	0.276	0.219	111115
145	17/6/2014	WT	6c	s36.2.6c	flag	4	36	17993.4	36.4	0.579	497	5.18	1.04	4.5	1	3.5	22.59	24.96	21.76	650.62	620.87	16.994	20.798	63.34	77.51	599.5	1999	10	102.5	2.1	0.194	111115
146	17/6/2014	WT	6c	s36.2.6c	flag	4	37	18186.4	39.9	0.618	736	5.38	1.02	4.5	1	3.5	22.61	24.95	21.76	901.3	867.91	16.986	20.938	63.23	77.94	600.1	1998	15	102.5	2.09	0.193	111115
147	17/6/2014	WT	6c	s36.2.6c	flag	4	38	18429.4	41.2	0.645	1030	5.56	1.02	4.5	1	3.5	22.77	24.99	21.97	1199.45	1163.68	16.981	21.063	62.6	77.66	599.8	2000	12	102.5	1.85	0.197	111115
148	17/6/2014	WT	6c	s36.2.6c	flag	4	39	18822.7	40.8	0.669	1330	5.65	1	4.5	1	3.5	22.76	24.95	21.96	1499.85	1463.03	16.983	21.132	62.64	77.94	599.8	1999	11	102.5	1.81	0.181	111115
149	18/6/2014	WT	7c	s36.2.7c	flag	4	11	6269.1	25.6	0.561	287	4.84	1	4.5	1	3.5	22.14	25.01	21.38	399.8	375.12	17.023	21.284	65.17	81.48	500.5	1999	26	102.5	1.72	0.203	111115
150	18/6/2014	WT	7c	s36.2.7c	flag	4	12	6451.4	20.5	0.614	215	5.07	0.967	4.5	1	3.5	22.17	24.98	21.37	299.58	279.88	17.1	21.561	65.35	82.4	500.2	1999	23	102.5	1.56	0.214	111115
151	18/6/2014	WT	7c	s36.2.7c	flag	4	13	6585.6	13.4	0.654	145	5.22	0.945	4.5	1	3.5	22.17	24.98	21.38	198.01	185.13	17.179	21.772	65.65	83.2	500.4	2001	32	102.5	1.27	0.227	111115
152	18/6/2014	WT	7c	s36.2.7c	flag	4	14	6699.8	5.16	0.686	78.8	5.34	0.928	4.5	1	3.5	22.19	24.98	21.38	99.21	94.12	17.252	21.945	65.85	83.77	500.4	1998	34	102.5	0.893	0.237	111115
153	18/6/2014	WT	7c	s36.2.7c	flag	4	15	6811	0.432	0.715	45.9	5.45	0.916	4.5	1	3.5	22.21	25.01	21.37	48.34	47.72	17.321	22.115	66.05	84.34	500.5	2000	24	102.5	0.57	0.241	111115
154	18/6/2014	WT	7c	s36.2.7c	flag	4	16	7342.2	37.8	0.827	519	5.78	0.861	4.5	1	3.5	22.54	24.97	21.77	651.51	614.32	17.488	22.568	65.35	84.33	500.3	1999	31	102.5	2.35	0.236	111115
155	18/6/2014	WT	7c	s36.2.7c	flag	4	17	7613.4	41.1	0.885	758	6.01	0.848	4.5	1	3.5	22.7	25.02	21.96	900.6	859.02	17.516	22.794	64.81	84.34	500.5	2000	15	102.5	2.61	0.245	111115
156	18/6/2014	WT	7c	s36.2.7c	flag	4	18	7924.6	42	0.89	1050	5.98	0.841	4.5	1	3.5	22.69	24.99	21.96	1200.01	1156.04	17.551	22.81	64.98	84.46	500.3	1999	21	102.5	2.69	0.234	111115
157	18/6/2014	WT	4c	s36.2.4c	flag	4	30	15110.5	27.6	0.881	309	6.42	0.903	4.2	1	3.63	23.4	24.97	22.74	399.21	373.99	16.89	22.167	59.88	78.59	499.6	2000	22	102.4	1.83	0.223	111115
158	18/6/2014	WT	4c	s36.2.4c	flag	4	31	15227.7	21.4	0.852	227	6.3	0.911	4.2	1	3.63	23.41	24.97	22.74	298.61	279.16	16.91	22.088	59.92	78.27	499.6	2001	22	102.4	1.7	0.23	111115
159	18/6/2014	WT	4c	s36.2.4c	flag	4	32	15365.9	13.9	0.829	153	6.24	0.923	4.2	1	3.63	23.53	25.02	22.93	200.03	187.35	16.925	22.063	59.54	77.62	499.2	1999	21	102.4	1.29	0.219	111115
160	18/6/2014	WT	4c	s36.2.4c	flag	4	33	15480.1	4.99	0.824	81.7	6.22	0.923	4.2	1	3.63	23.44	25.02	22.74	99.22	94.54	16.954	22.066	59.99	78.08	499.6	1999	18	102.4	0.894	0.222	111115
161	18/6/2014	WT	4c	s36.2.4c	flag	4	34	15588.3	0.3	0.841	47.2	6.28	0.916	4.2	1	3.63	23.42	25.02	22.74	49.06	48.55	16.976	22.128	60.11	78.35	500.2	2000	18	102.4	0.596	0.225	111115
162	18/6/2014	WT	4c	s36.2.4c	flag	4	35	15923.4	28.6	0.852	306	6.28	0.908	4.2	1	3.63	23.43	24.99	22.74	401.38	375.34	16.995	22.161	60.17	78.45	499.7	2001	18	102.4	1.95	0.221	111115
163	18/6/2014	WT	4c	s36.2.4c	flag	4	36	16140.6	36.9	0.876	527	6.38	0.902	4.2	1	3.63	23.56	25.01	22.93	651.08	616.76	17.008	22.253	59.73	78.15	499.5	2000	17	102.4	2.21	0.205	111115
164	18/6/2014	WT	4c	s36.2.4c	flag	4	37	16341.7	38.8	0.887	769	6.49	0.907	4.2	1	3.63	23.72	25.08	23.13	902.06	864.82	17.005	22.332	59.15	77.69	500.4	1999	16	102.4	2.39	0.208	111115
165	18/6/2014	WT	4c	s36.2.4c	flag	4	38	16551.8	39.2	0.893	1060	6.48	0.901	4.2	1	3.63	23.71	25.04	23.13	1199.76	1160.52	17.001	22.316	59.17	77.67	500.5	2000	23	102.4	2.34	0.202	111115
166	18/6/2014	WT	4c	s36.2.4c	flag	4	39	16922	39.4	0.872	1350	6.4	0.907	4.2	1	3.63	23.58	25.06	22.93	1500.35	1459.39	17.043	22.301	59.79	78.24	499.8	2001	22	102.4	2.3	0.193	111115
167	19/6/2014	WT	9c	s36.2.9c	flag	4	21	6283.2	31.4	1.36	306	8	0.846	5.55	1	3.04	23.66	24.98	22.93	399.1	361.04	14.167	22.853	49.23	79.41	499.5	1999	10	102	2.22	0.218	111115
168	19/6/2014	WT	9c	s36.2.9c	flag	4	22	6526.5	24.7	1.34	226	8.04	0.858	5.55	1	3.04	23.8	25.04	23.13	299.54	269.7	14.125	22.85	48.68	78.75	499.7	2000	9	102	1.96	0.188	111115
169	19/6/2014	WT	9c	s36.2.9c	flag	4	23	6719.5	16.4	1.37	151	8.1	0.852	5.55	1	3.04	23.67	25.03	22.93	199.64	179.83	14.095	22.871	48.96	79.44	500.3	2001	10	102	1.51	0.206	111115
170	19/6/2014	WT	9c	s36.2.9c	flag	4	24	6923.7	7.43	1.39	78.5	8.15	0.847	5.55	1	3.04	23.66	25.02	22.93	100.53	91.45	14.061	22.906	48.86	79.59	499.6	2000	6	102	1.09	0.206	111115
171	19/6/2014	WT	9c	s36.2.9c	flag	4	25	7158.9	0.827	1.4	45.9	8.19	0.85	5.55	1	3.04	23.67	25.04	22.94	49.19	47.83	14.019	22.912	48.69	79.58	499.6	2000	4	102	0.761	0.202	111115
172	19/6/2014	WT	9c	s36.2.9c	flag	4	26	7651	31.1	1.38	307	8.14	0.851	5.55	1	3.04	23.8	24.98	23.12	399.69	361.84	13.958	22.792	48.11	78.55	499.5	2000	10	102	2.26	0.186	111115
173	19/6/2014	WT	9c	s36.2.9c	flag	4	27	7979.3	40.4	1.37	527	8.14	0.855	5.55	1	3.04	23.81	24.98	23.12	650.46	600.15	13.934	22.769	47.98	78.4	499.5	2000	11	102	2.77	0.176	111115
174	19/6/2014	WT	9c	s36.2.9c	flag	4	28	8220.4	43.1	1.36	764	8.11	0.857	5.55	1	3.04	23.81	24.97	23.13	900.61	845.07	13.923	22.732	47.94	78.27	499.4	1999	9	102	2.81	0.164	111115
175	19/6/2014	WT	9c	s36.2.9c	flag	4	29	8540.5	43.4	1.34	1060	8.09	0.861	5.55	1	3.04	23.8	24.97	23.12	1199.73	1141.28	13.907	22.691	47.92	78.19	499.4	2000	6	102	2.86	0.162	111115
176	19/6/2014	WT	9c	s36.2.9c	flag	4	30	8834.6	42.5	1.34	1350	8.02	0.857	5.55	1	3.04	23.65	24.92	22.92	1500	1439.91	13.911	22.622	48.37	78.66	499.1	2000	6	102	2.98	0.169	111115
177	13/6/2014	WT	7c	s31.1.7c	flag	4	1	3475.6	34.9	1.03	295	8.34	1.05	4.8	1	3.37	21.48	24.99	20.2	399.4	369.01	14.22	20.755	56.62	82.64	599.8	2000	29	102.3	1.91	0.183	111115
178	13/6/2014	WT	7c	s31.1.7c	flag	4	2	3655.7	27.6	1.03	217	8.36	1.06	4.8	1	3.37	21.48	25	20.19	299.13	275.19	14.196	20.75	56.52	82.62	599.7	1999	28	102.3	1.48	0.18	111115
179	13/6/2014	WT	7c	s31.1.7c	flag	4	3	3859.9	18.3	1.04	145	8.41	1.05	4.8	1	3.37	21.47	25	20.2	199.45	183.59	14.19	20.784	56.53	82.79	599.7	2001	28	102.3	1.18	0.184	111115
180	13/6/2014	WT	7c	s31.1.7c	flag	4	4	4061.1	7.32	1.05	77.2	8.46	1.05	4.8	1	3.37	21.46	25	20.21	99.19	92.7	14.17	20.8	56.46	82.89	599.5	1999	27	102.3	0.648	0.191	111115
181	13/6/2014	WT	7c	s31.1.7c	flag	4	5	4245.2	1.38	1.06	45.7	8.47	1.05	4.8	1	3.37	21.45	24.97	20.19	50.61	49.17	14.14	20.787	56.39	82.89	599.3	1999	27	102.3	0.389	0.189	111115
182	13/6/2014	WT	7c	s31.1.7c	flag	4	6	4746.3	34.9	1.05	296	8.49	1.06	4.8	1	3.37	21.61	24.97	20.4	399.45	369.04	14.037	20.689	55.44	81.71	599.7	2000	12	102.3	1.77	0.178	111115
183	13/6/2014	WT	7c	s31.1.7c	flag	4	7	5110.5	44.1	1.04	515	8.51	1.07	4.8	1	3.37	21.75	25	20.58	649.34	609.89	13.94	20.616	54.58	80.71	599.6	2000	26	102.3	2.17	0.169	111115
184	13/6/2014	WT	7c	s31.1.7c	flag	4	8	5443.7	46.3	1.02	753	8.46	1.08	4.8	1	3.37	21.62	24.97	20.39	900.44	857.56	13.87	20.498	54.76	80.93	599.8	2000	14	102.3	2.47	0.168	111115
185	13/6/2014	WT	7c	s31.1.7c	flag	4	9	5929.8	46.5	0.991	1040	8.41	1.1	4.8	1	3.37	21.63	25.01	20.4	1199.7	1154.71	13.799	20.398	54.43	80.46	599.3	2001	14	102.3	2.47	0.154	111115
186	13/6/2014	WT	7c	s31.1.7c	flag	4	10	6533.9	45.2	0.956	1200	8.37	1.12	4.8	1	3.37	21.61	25.07	20.39	1358.25	1313.27	13.691	20.255	54.07	80	599.8	1999	17	102.3	2.41	0.16	111125
187	16/6/2014	WT	8c	s31.1.8c	flag	4	20	14221.8	26.1	0.475	244	4.23	1.02	4.8	1	3.37	22.41	24.96	21.96	400.23	347.21	13.069	21.033	49.25	79.25	249.9	2000	20	102.5	1.63	0.0952	111115
188	16/6/2014	WT	8c	s31.1.8c	flag	4	21	14442.9	20.6	0.53	184	4.49	0.98	4.8	1	3.37	22.48	25.03	21.96	299.8	258.08	13.07	21.513	49.04	80.72	249.9	1999	16	102.5	1.47	0.125	111115
189	16/6/2014	WT	8c	s31.1.8c	flag	4	22	14650	13.4	0.58	127	4.65	0.938	4.8	1	3.37	22.35	24.98	21.76	199.48	172.13	13.1	21.829	49.56	82.59	249.9	2000	20	102.5	1.34	0.162	111115
190	16/6/2014	WT	8c	s31.1.8c	flag	4	23	14799.1	5.23	0.603	71.2	4.72	0.921	4.8	1	3.37	22.34	24.99	21.76	99.21	88.36	13.152	22.01	49.77	83.29	249.9	1999	23	102.5	1.04	0.188	111115
191	16/6/2014	WT	8c	s31.1.8c	flag	4	24	15004.3	0.682	0.625	44.5	4.81	0.911	4.8	1	3.37	22.24	25.07	21.58	48.91	47.16	13.223	22.254	50.35	84.74	249.9	1998	18	102.5	1.02	0.226	111115
192	16/6/2014	WT	8c	s31.1.8c	flag	4	25	15468.5	29.8	0.685	254	4.9	0.859	4.8	1	3.37	22.1	24.98	21.38	399.87	339.38	13.388	22.599	51.41	86.77	249.6	2000	21	102.5	2.8	0.325	111115
193	16/6/2014	WT	8c	s31.1.8c	flag	4	26	15845.7	41.5	0.752	453	5.07	0.824	4.8	1	3.37	22.28	25	21.57	649.85	564.75	13.471	22.983	51.16	87.28	250.2	1999	13	102.5	4.61	0.488	111115
194	16/6/2014	WT	8c	s31.1.8c	flag	4	27	16121.8	45.3	0.767	683	5.07	0.809	4.8	1	3.37	22.12	24.96	21.37	900.35	805.48	13.554	23.061	51.97	88.42	249.8	2000	19	102.5	5.43	0.502	111115
195	16/6/2014	WT	8c	s31.1.8c	flag	4	28	16527	46.2	0.773	974	5.09	0.807	4.8	1	3.37	22.12	25.01	21.38	1201.35	1101.83	13.603	23.157	52.15	88.78	249.7	2000	25	102.5	5.77	0.49	111115
196	16/6/2014	WT	8c	s31.1.8c	flag	4	29	17012.1	45.8	0.78	1270	5.11	0.805	4.8	1	3.37	22.12	25.01	21.38	1499.14	1397.5	13.611	23.197	52.2	88.96	249.9	1999	21	102.5	5.7	0.448	111115
197	19/6/2014	WT	3c	s13.1.3c	flag	4	51	15389.4	29.9	0.647	284	7.16	1.29	3.75	1	3.83	23.45	24.9	22.93	399.18	374.78	13.087	18.358	46.08	64.64	500.3	1999	6	102	1.45	0.156	111115
198	19/6/2014	WT	3c	s13.1.3c	flag	4	52	15670.6	23.2	0.703	213	7.64	1.28	3.75	1	3.83	23.79	25.03	23.26	298.5	279.51	13.042	18.66	45.01	64.39	500.7	2000	7	102	1.36	0.162	111115
199	19/6/2014	WT	3c	s13.1.3c	flag	4	53	15847.8	15.2	0.733	145	7.75	1.25	3.75	1	3.83	23.66	24.92	23.13	199.76	187.27	13.026	18.729	45.31	65.15	500.4	2000	5	102	1.05	0.158	111115
200	19/6/2014	WT	3c	s13.1.3c	flag	4	54	16022.1	5.58	0.752	78.5	7.9	1.25	3.75	1	3.83	23.79	24.96	23.31	98.84	94.1	13.008	18.819	44.89	64.95	500.2	2001	6	102	0.633	0.159	111115
201	19/6/2014	WT	3c	s13.1.3c	flag	4	55	16157.4	0.311	0.756	46.1	7.94	1.25	3.75	1	3.83	23.8	24.97	23.32	48.3	47.79	12.995	18.832	44.82	64.96	500.6	2000	5	102.1	0.373	0.154	111115
202	19/6/2014	WT	3c	s13.1.3c	flag	4	56	16643.6	30.3	0.771	295	8.08	1.25	3.75	1	3.83	23.98	24.98	23.52	400.15	375.16	12.905	18.845	44.04	64.32	500.5	2001	6	102.1	1.54	0.144	111115
203	19/6/2014	WT	3c	s13.1.3c	flag	4	57	16864.7	39.5	0.788	511	8.17	1.25	3.75	1	3.83	24.1	24.96	23.72	650.19	616.73	12.847	18.866	43.52	63.9	499.7	2000	6	102.1	1.85	0.137	111115
204	19/6/2014	WT	3c	s13.1.3c	flag	4	58	17065.9	42	0.799	749	8.29	1.25	3.75	1	3.83	24.25	24.98	23.91	900.31	863.49	12.798	18.89	42.98	63.43	500.4	2001	6	102.1	1.72	0.124	111115
205	19/6/2014	WT	3c	s13.1.3c	flag	4	59	17298.1	42.4	0.811	1040	8.37	1.25	3.75	1	3.83	24.13	24.98	23.72	1202.12	1163.05	12.766	18.92	43.17	63.98	500.3	2001	5	102.1	1.74	0.137	111115
206	19/6/2014	WT	3c	s13.1.3c	flag	4	60	17538.3	42.2	0.801	1330	8.34	1.25	3.75	1	3.83	24.26	24.99	23.9	1499.37	1458.65	12.717	18.85	42.68	63.27	500.4	2000	5	102.1	1.51	0.123	111115
268	13/6/2014	Sox4	9+	s78.9+	flag	4	11	7422	36.3	1.06	293	8.84	1.09	4.8	1	3.37	22.24	25.04	21.17	399.6	367.94	13.567	20.497	51.56	77.9	599.6	1999	14	102.3	1.78	0.162	111115
269	13/6/2014	Sox4	9+	s78.9+	flag	4	12	7628.2	28.3	1.06	215	8.77	1.08	4.8	1	3.37	22.11	24.99	20.97	298.55	273.94	13.572	20.448	51.99	78.33	599.6	2001	13	102.3	1.51	0.169	111115
270	13/6/2014	Sox4	9+	s78.9+	flag	4	13	7799.3	18.6	1.05	144	8.75	1.09	4.8	1	3.37	22.09	24.98	20.98	198.73	182.54	13.553	20.413	51.96	78.26	599.6	2002	13	102.3	1.08	0.175	111115
271	13/6/2014	Sox4	9+	s78.9+	flag	4	14	8045.5	7.35	1.05	77.2	8.75	1.09	4.8	1	3.37	22.1	25	20.98	99.4	92.87	13.529	20.392	51.85	78.15	599.8	2000	15	102.3	0.651	0.169	111115
272	13/6/2014	Sox4	9+	s78.9+	flag	4	15	8199.7	1.15	1.04	44.9	8.76	1.1	4.8	1	3.37	22.09	25.03	20.98	49.2	47.94	13.507	20.371	51.79	78.12	599.8	2000	18	102.3	0.354	0.175	111115
273	13/6/2014	Sox4	9+	s78.9+	flag	4	16	8649.8	36.5	1.01	290	8.69	1.11	4.8	1	3.37	22.25	25.04	21.18	400.12	368.31	13.436	20.251	51.02	76.9	599.5	1999	20	102.3	1.72	0.168	111115
274	13/6/2014	Sox4	9+	s78.9+	flag	4	17	8947	47.1	1.01	504	8.65	1.11	4.8	1	3.37	22.11	25	20.98	649.71	607.79	13.437	20.221	51.45	77.43	599.6	2000	19	102.3	2.21	0.163	111115
275	13/6/2014	Sox4	9+	s78.9+	flag	4	18	9237.2	50	1.02	741	8.68	1.11	4.8	1	3.37	22.12	25	20.98	900.2	854.23	13.423	20.233	51.38	77.45	599.8	1999	14	102.3	2.32	0.157	111115
276	13/6/2014	Sox4	9+	s78.9+	flag	4	19	9585.4	49.6	0.997	1030	8.66	1.12	4.8	1	3.37	22.24	25.04	21.18	1200.94	1153.23	13.395	20.189	50.9	76.72	599.2	1999	15	102.3	2.33	0.147	111115
277	13/6/2014	Sox4	9+	s78.9+	flag	4	20	10693.5	47.8	0.935	1320	8.42	1.15	4.8	1	3.37	21.98	25.04	20.79	1490.93	1443	13.339	19.94	51.47	76.94	600.5	1999	14	102.3	2.11	0.148	111125
278	16/6/2014	Sox4	7+	s78.17+	flag	4	1	4876.3	34.4	0.968	291	8.41	1.13	5.1	1	3.24	24.14	25.05	23.91	399.96	368.04	13.091	20.098	44.44	68.23	599.9	1999	16	102.6	1.48	0.0715	111115
279	16/6/2014	Sox4	7+	s78.17+	flag	4	2	5047.4	26.6	0.981	216	8.42	1.12	5.1	1	3.24	24.01	25.02	23.71	299.28	274.7	13.123	20.14	44.92	68.93	599.6	2001	17	102.6	1.37	0.0677	111115
280	16/6/2014	Sox4	7+	s78.17+	flag	4	3	5190.5	17.6	0.995	145	8.42	1.11	5.1	1	3.24	23.99	24.98	23.7	200.04	183.79	13.164	20.181	45.12	69.16	599.8	1999	13	102.6	1	0.0728	111115
281	16/6/2014	Sox4	7+	s78.17+	flag	4	4	5358.7	6.73	0.997	79.4	8.45	1.11	5.1	1	3.24	23.99	25.03	23.72	100.97	94.56	13.215	20.258	45.28	69.41	599.8	1999	12	102.6	0.623	0.0773	111115
282	16/6/2014	Sox4	7+	s78.17+	flag	4	5	5513.9	0.522	0.999	45.8	8.48	1.11	5.1	1	3.24	24.01	25.07	23.72	48.42	47.63	13.242	20.311	45.32	69.52	599.7	2000	15	102.6	0.415	0.0751	111115
283	16/6/2014	Sox4	7+	s78.17+	flag	4	6	5934.1	34	0.994	294	8.35	1.1	5.1	1	3.24	23.73	24.95	23.32	399.82	368.29	13.261	20.216	46.15	70.35	599.8	2001	27	102.6	1.46	0.0669	111115
284	16/6/2014	Sox4	7+	s78.17+	flag	4	7	6273.3	44.8	0.993	508	8.38	1.1	5.1	1	3.24	23.87	25	23.52	650.96	608.53	13.28	20.264	45.82	69.92	599.9	2001	23	102.6	1.75	0.0644	111115
285	16/6/2014	Sox4	7+	s78.17+	flag	4	8	6553.5	47.5	0.993	744	8.36	1.1	5.1	1	3.24	23.86	24.97	23.52	900.98	854.49	13.26	20.225	45.78	69.83	599.7	1999	18	102.6	1.62	0.0657	111115
286	16/6/2014	Sox4	7+	s78.17+	flag	4	9	7078.6	47.4	0.986	1030	8.34	1.1	5.1	1	3.24	23.74	25.02	23.32	1199.06	1150.55	13.338	20.286	46.39	70.56	599.6	2000	11	102.6	1.59	0.0649	111115
287	16/6/2014	Sox4	7+	s78.17+	flag	4	10	7678.7	46.9	0.968	1150	8.31	1.11	5.1	1	3.24	23.86	25.08	23.52	1317.12	1268.3	13.355	20.282	46.11	70.02	599.7	2000	14	102.5	1.33	0.0657	111125
288	16/6/2014	Sox4	11+	s78.11+	flag	4	11	9668.9	31.9	0.739	274	6.57	1.1	5.4	1	3.1	23.18	24.98	22.75	399.47	362.44	13.256	20.219	47.68	72.73	499.6	1999	10	102.6	1.49	0.0804	111115
289	16/6/2014	Sox4	11+	s78.11+	flag	4	12	9893.1	24.5	0.762	205	6.68	1.09	5.4	1	3.1	23.18	24.96	22.74	299.74	271.24	13.207	20.285	47.51	72.98	499.6	2001	10	102.6	1.18	0.0892	111115
290	16/6/2014	Sox4	11+	s78.11+	flag	4	13	10052.4	15.7	0.771	138	6.77	1.09	5.4	1	3.1	23.31	25	22.94	198.13	179.87	13.154	20.321	46.96	72.54	499.5	2000	10	102.6	0.938	0.0885	111115
291	16/6/2014	Sox4	11+	s78.11+	flag	4	14	10198.5	5.76	0.783	76.6	6.83	1.09	5.4	1	3.1	23.33	25.02	22.93	99.27	92.35	13.159	20.399	46.93	72.74	499.1	1999	11	102.6	0.579	0.0964	111115
292	16/6/2014	Sox4	11+	s78.11+	flag	4	15	10340.6	0.616	0.789	45.4	6.88	1.09	5.4	1	3.1	23.34	25.06	22.94	48.73	47.71	13.184	20.467	46.98	72.94	499.6	2000	11	102.6	0.308	0.0971	111115
293	16/6/2014	Sox4	11+	s78.11+	flag	4	16	10791.7	32.2	0.8	279	6.87	1.08	5.4	1	3.1	23.32	24.98	22.93	400.38	362.92	13.178	20.45	47	72.93	499.4	1999	16	102.5	1.34	0.0861	111115
294	16/6/2014	Sox4	11+	s78.11+	flag	4	17	11048	43.2	0.815	485	6.94	1.07	5.4	1	3.1	23.36	25.02	22.93	648.86	597.66	13.223	20.572	47.05	73.2	499.6	1999	21	102.6	1.73	0.0797	111115
295	16/6/2014	Sox4	11+	s78.11+	flag	4	18	11305.1	46.3	0.838	724	7.01	1.06	5.4	1	3.1	23.37	25.01	22.94	901.87	845.43	13.267	20.687	47.19	73.58	499.6	1999	24	102.5	1.69	0.0782	111115
296	16/6/2014	Sox4	11+	s78.11+	flag	4	19	11673.3	46.4	0.856	1020	7.03	1.05	5.4	1	3.1	23.35	25	22.93	1200.68	1141.77	13.349	20.797	47.51	74.02	499.5	2001	28	102.5	1.53	0.058	111115
297	23/6/2014	Sox4	15	s78.15	flag	4	30	12537.7	25.8	0.47	271	4.83	1.16	4.5	1	3.5	21.98	25.04	20.99	399.68	374.83	15.603	19.869	60.08	76.51	499.5	2000	10	102.1	1.78	0.132	111115
298	23/6/2014	Sox4	15	s78.15	flag	4	31	12743.8	20.2	0.522	206	5.09	1.12	4.5	1	3.5	21.95	24.93	20.98	299.59	280.09	15.601	20.099	60.2	77.56	499.4	2001	10	102.1	1.55	0.149	111115
299	23/6/2014	Sox4	15	s78.15	flag	4	32	12902	13.3	0.566	141	5.37	1.1	4.5	1	3.5	22.22	24.96	21.38	199	186.14	15.595	20.337	59.19	77.19	499.6	2000	10	102.1	1.1	0.163	111115
300	23/6/2014	Sox4	15	s78.15	flag	4	33	13113.2	4.98	0.605	77.4	5.66	1.09	4.5	1	3.5	22.41	25.05	21.57	98.96	94	15.563	20.558	58.37	77.1	499.6	2000	10	102.1	0.633	0.149	111115
301	23/6/2014	Sox4	15	s78.15	flag	4	34	13239.4	0.632	0.616	46.5	5.74	1.09	4.5	1	3.5	22.43	25.09	21.57	49.99	49.17	15.582	20.641	58.38	77.33	499.7	1999	10	102.1	0.351	0.155	111115
302	23/6/2014	Sox4	15	s78.15	flag	4	35	13548.7	28.4	0.63	285	5.74	1.07	4.5	1	3.5	22.41	24.97	21.57	401.69	374.15	15.559	20.624	58.38	77.38	499.1	2000	10	102.1	1.77	0.146	111115
303	23/6/2014	Sox4	15	s78.15	flag	4	36	13842.9	38.7	0.666	495	5.94	1.06	4.5	1	3.5	22.57	24.97	21.76	650.8	612.66	15.513	20.754	57.63	77.11	499.5	2000	9	102.1	2.01	0.157	111115
304	23/6/2014	Sox4	15	s78.15	flag	4	37	14228.1	41.5	0.696	734	6.16	1.06	4.5	1	3.5	22.74	24.98	21.95	900.44	858.31	15.33	20.768	56.37	76.37	499.5	2000	9	102.1	2.01	0.148	111115
305	23/6/2014	Sox4	15	s78.15	flag	4	38	14562.2	41.2	0.705	1030	6.29	1.06	4.5	1	3.5	22.89	24.99	22.15	1199.51	1155.86	15.156	20.702	55.24	75.45	499.5	2001	8	102.1	1.97	0.132	111115
306	23/6/2014	Sox4	15	s78.15	flag	4	39	15001.2	41	0.687	1320	6.33	1.1	4.5	1	3.5	22.92	25.14	22.16	1497.76	1452.59	15.109	20.688	54.93	75.22	499.7	2000	10	102.1	1.97	0.132	111115
307	23/6/2014	Sox4	9+	s78.9+	flag t	4	40	15953.3	31.2	0.746	282	6.31	1.03	4.8	1	3.37	23.35	24.94	22.74	398.87	366.72	15.039	20.978	53.29	74.33	499.7	2000	8	102.1	1.66	0.12	111115
308	23/6/2014	Sox4	9+	s78.9+	flag t	4	41	16131.3	24.3	0.781	211	6.48	1.02	4.8	1	3.37	23.36	24.97	22.74	299.27	274.21	15.073	21.155	53.39	74.93	500.3	2000	9	102.1	1.39	0.106	111115
309	23/6/2014	Sox4	9+	s78.9+	flag t	4	42	16309.6	15.5	0.827	144	6.69	1	4.8	1	3.37	23.51	25.03	22.93	198.48	182.42	15.132	21.41	53.11	75.15	500.3	2000	10	102	1.05	0.111	111115
310	23/6/2014	Sox4	9+	s78.9+	flag t	4	43	16479.8	6.14	0.849	78.4	6.77	0.993	4.8	1	3.37	23.41	25.07	22.74	100.28	93.79	15.203	21.56	53.68	76.13	500.5	2001	11	102.1	0.7	0.105	111115
311	23/6/2014	Sox4	9+	s78.9+	flag t	4	44	16614	0.634	0.866	46.3	6.81	0.982	4.8	1	3.37	23.28	25.07	22.55	49.38	48.46	15.28	21.666	54.37	77.1	500.5	1999	10	102.1	0.456	0.14	111115
312	23/6/2014	Sox4	9+	s78.9+	flag t	4	45	16999.2	32	0.87	290	6.64	0.954	4.8	1	3.37	23.27	25	22.54	400.16	367.12	15.572	21.804	55.45	77.65	500.6	1999	11	102.1	1.72	0.142	111115
313	23/6/2014	Sox4	9+	s78.9+	flag t	4	46	17243.3	42.6	0.889	504	6.64	0.938	4.8	1	3.37	23.27	25	22.54	651.35	606.58	15.748	21.975	56.08	78.26	500.3	2000	11	102.1	2.17	0.138	111115
314	23/6/2014	Sox4	9+	s78.9+	flag t	4	47	17503.5	45.5	0.897	741	6.65	0.933	4.8	1	3.37	23.4	25.04	22.74	901.15	852.07	15.843	22.084	55.96	78	500.4	2001	10	102	2.27	0.141	111115
315	23/6/2014	Sox4	9+	s78.9+	flag t	4	48	17833.8	45.6	0.916	1040	6.67	0.92	4.8	1	3.37	23.41	25.01	22.74	1200.17	1149.05	15.901	22.157	56.13	78.22	500.3	2000	11	102.1	2.38	0.129	111115
316	23/6/2014	Sox4	9+	s78.9+	flag t	4	49	18202.9	45.2	0.906	1330	6.7	0.932	4.8	1	3.37	23.55	25.12	22.93	1499.75	1447.01	15.948	22.242	55.83	77.87	499.6	2001	10	102.1	2.11	0.133	111115
317	12/6/2014	AZ	12+	s71.6.12+	flag	4	1	2237.4	31.4	0.731	287	6.16	1.03	4.8	1	3.37	21.29	24.95	20.01	400.79	373.84	16.041	20.87	64.84	84.37	599.7	2000	29	102.7	1.52	0.19	111115
318	12/6/2014	AZ	12+	s71.6.12+	flag	4	2	2454.7	24.4	0.766	214	6.37	1.02	4.8	1	3.37	21.43	24.98	20.2	299.42	278.43	15.986	20.977	64.07	84.07	599.5	1999	31	102.7	1.34	0.178	111115
319	12/6/2014	AZ	12+	s71.6.12+	flag	4	3	2742.9	16.6	0.831	145	6.65	0.999	4.8	1	3.37	21.45	24.95	20.19	200.17	185.92	15.924	21.137	63.72	84.58	599.8	2001	32	102.7	1.04	0.179	111115
320	12/6/2014	AZ	12+	s71.6.12+	flag	4	4	2961	6.66	0.861	78.1	6.81	0.993	4.8	1	3.37	21.58	24.95	20.4	100.33	94.48	15.868	21.202	63.02	84.2	599.7	2001	21	102.7	0.558	0.175	111115
321	12/6/2014	AZ	12+	s71.6.12+	flag	4	5	3170.2	1.23	0.877	45.5	6.96	1	4.8	1	3.37	21.73	25.02	20.59	50.29	49.03	15.804	21.255	62.2	83.65	599.8	1999	21	102.7	0.242	0.179	111115
322	12/6/2014	AZ	12+	s71.6.12+	flag	4	6	3676.3	31.6	0.867	297	6.94	1.01	4.8	1	3.37	21.74	24.98	20.6	401.22	373.85	15.679	21.112	61.65	83.02	600	2000	19	102.7	1.57	0.176	111115
323	12/6/2014	AZ	12+	s71.6.12+	flag	4	7	4034.4	41	0.883	515	7.02	1	4.8	1	3.37	21.74	24.94	20.59	650.6	614.38	15.588	21.081	61.3	82.9	600.4	2000	19	102.7	1.83	0.174	111115
324	12/6/2014	AZ	12+	s71.6.12+	flag	4	8	4408.4	43	0.893	753	7.14	1.01	4.8	1	3.37	21.9	24.99	20.79	899.86	860.5	15.484	21.082	60.29	82.09	599.7	1999	25	102.7	2.15	0.163	111115
325	12/6/2014	AZ	12+	s71.6.12+	flag	4	9	4867.6	43.3	0.913	1050	7.35	1.02	4.8	1	3.37	22.05	25.07	20.98	1199.74	1158.26	15.376	21.132	59.33	81.54	599.6	1999	25	102.7	2.03	0.155	111115
326	13/6/2014	AZ	11+	s71.6.11+	flag	4	21	11659.6	37.6	1.2	297	9.63	1.08	4.65	1	3.43	22.92	24.99	21.95	399.5	367.6	13.175	20.487	48.04	74.71	599.8	2001	21	102.3	1.65	0.14	111115
327	13/6/2014	AZ	11+	s71.6.11+	flag	4	22	11881.9	29.5	1.2	219	9.7	1.09	4.65	1	3.43	22.94	25.05	21.95	299.29	274.37	13.167	20.537	47.95	74.79	599.6	2000	16	102.3	1.43	0.143	111115
328	13/6/2014	AZ	11+	s71.6.11+	flag	4	23	12063	19.6	1.21	146	9.7	1.08	4.65	1	3.43	22.8	25.03	21.75	198.71	182.16	13.184	20.552	48.41	75.47	599.6	2000	14	102.3	1.04	0.141	111115
329	13/6/2014	AZ	11+	s71.6.11+	flag	4	24	12229.2	7.91	1.21	78.2	9.66	1.07	4.65	1	3.43	22.76	24.96	21.75	100.07	93.24	13.172	20.507	48.49	75.49	599.7	2001	15	102.3	0.586	0.149	111115
330	13/6/2014	AZ	11+	s71.6.11+	flag	4	25	12413.3	1.1	1.22	45.3	9.72	1.08	4.65	1	3.43	22.76	24.98	21.75	49.15	47.94	13.146	20.526	48.38	75.55	599.7	1999	17	102.3	0.354	0.148	111115
331	13/6/2014	AZ	11+	s71.6.11+	flag	4	26	12849.4	37.5	1.21	299	9.7	1.08	4.65	1	3.43	22.79	24.99	21.76	401.14	369.29	13.134	20.5	48.26	75.33	599.6	2000	19	102.3	1.62	0.151	111115
332	13/6/2014	AZ	11+	s71.6.11+	flag	4	27	13108.7	48	1.2	517	9.67	1.08	4.65	1	3.43	22.79	24.98	21.75	651.38	609.56	13.133	20.477	48.24	75.22	599.7	2000	14	102.3	2.09	0.142	111115
333	13/6/2014	AZ	11+	s71.6.11+	flag	4	28	13377.9	50.4	1.18	752	9.62	1.09	4.65	1	3.43	22.79	25.01	21.76	900.04	854.63	13.111	20.405	48.18	74.98	600.6	1999	13	102.3	2.16	0.131	111115
334	13/6/2014	AZ	11+	s71.6.11+	flag	4	29	13685.1	50	1.12	1040	9.45	1.12	4.65	1	3.43	22.78	25.06	21.76	1199.69	1152.52	13.09	20.261	48.12	74.49	600.5	1999	15	102.3	2.25	0.133	111115
335	13/6/2014	AZ	11+	s71.6.11+	flag	4	30	14259.2	49.8	0.988	1330	8.92	1.16	4.65	1	3.43	22.6	25.04	21.57	1500.34	1451.74	13.069	19.836	48.58	73.74	600.7	2000	18	102.3	1.89	0.141	111115
336	19/6/2014	AZ	28-	s71.6.28-	flag	4	31	9531.7	26.7	0.625	288	6.37	1.19	4.5	1	3.5	22.86	25.04	21.9	399.36	373.18	13.911	19.542	50.75	71.29	499.4	2000	3	102	1.78	0.185	111115
337	19/6/2014	AZ	28-	s71.6.28-	flag	4	32	9712.7	20.4	0.575	210	6.04	1.22	4.5	1	3.5	22.53	25	21.56	299.5	279.64	13.921	19.259	51.81	71.68	499.5	2001	2	102	1.53	0.183	111115
338	19/6/2014	AZ	28-	s71.6.28-	flag	4	33	9874.8	13	0.582	142	6.09	1.21	4.5	1	3.5	22.63	25.01	21.76	199	186.24	13.925	19.304	51.49	71.38	499.5	2000	2	102	1.12	0.178	111115
339	19/6/2014	AZ	28-	s71.6.28-	flag	4	34	10008	4.81	0.591	77	6.12	1.2	4.5	1	3.5	22.5	24.98	21.57	98.41	93.56	13.934	19.34	51.93	72.07	499.5	2001	2	102	0.614	0.191	111115
340	19/6/2014	AZ	28-	s71.6.28-	flag	4	35	10188.1	0.618	0.601	46.1	6.17	1.2	4.5	1	3.5	22.61	24.96	21.76	49.69	48.86	13.935	19.385	51.59	71.78	499.5	2000	2	102	0.342	0.189	111115
341	19/6/2014	AZ	28-	s71.6.28-	flag	4	36	10650.2	27.2	0.617	287	6.3	1.19	4.5	1	3.5	22.91	24.99	22.15	401.24	374.65	13.888	19.456	50.49	70.73	499.5	2000	7	102	1.72	0.183	111115
342	19/6/2014	AZ	28-	s71.6.28-	flag	4	37	10897.3	36.8	0.639	497	6.44	1.18	4.5	1	3.5	23.06	24.98	22.35	650.48	613.73	13.841	19.529	49.88	70.38	499.5	2000	7	102	2.11	0.171	111115
343	19/6/2014	AZ	28-	s71.6.28-	flag	4	38	11128.4	40	0.662	733	6.58	1.18	4.5	1	3.5	23.08	24.98	22.35	901.08	859.93	13.804	19.616	49.68	70.6	499.5	2000	8	102	2.19	0.166	111115
344	19/6/2014	AZ	28-	s71.6.28-	flag	4	39	11414.5	40.7	0.68	1020	6.75	1.18	4.5	1	3.5	23.24	25.05	22.54	1199.51	1155.82	13.751	19.712	49.01	70.25	499.4	2000	7	102	2.15	0.152	111115
345	19/6/2014	AZ	28-	s71.6.28-	flag	4	40	11709.5	40.1	0.684	1320	6.8	1.18	4.5	1	3.5	23.37	25.05	22.73	1500.55	1455.53	13.68	19.688	48.39	69.64	499.6	2000	8	102	2.04	0.151	111115
346	19/6/2014	AZ	29+	s71.6.29+	flag	4	61	18613.6	31	0.725	283	6.19	1.03	4.65	1	3.43	24.05	24.98	23.71	400.28	369.31	15.404	21.034	52.35	71.48	500.5	2001	5	102.1	1.32	0.156	111115
347	19/6/2014	AZ	29+	s71.6.29+	flag	4	62	18840.7	24	0.789	213	6.5	1.01	4.65	1	3.43	24.21	24.99	23.91	299.37	275.43	15.344	21.259	51.66	71.57	500.3	2000	5	102.1	1.36	0.149	111115
348	19/6/2014	AZ	29+	s71.6.29+	flag	4	63	19032	15.6	0.826	144	6.7	1	4.65	1	3.43	24.22	25.02	23.91	198.91	183.25	15.283	21.374	51.42	71.92	500.5	1999	6	102.1	0.971	0.151	111115
349	19/6/2014	AZ	29+	s71.6.29+	flag	4	64	19201.1	5.98	0.853	78.8	6.83	0.993	4.65	1	3.43	24.22	25.02	23.91	99.83	93.68	15.241	21.449	51.28	72.17	500.4	2000	6	102.1	0.639	0.152	111115
350	19/6/2014	AZ	29+	s71.6.29+	flag	4	65	19414.2	0.775	0.88	46.2	6.92	0.982	4.65	1	3.43	24.21	24.98	23.91	49.7	48.66	15.18	21.474	51.1	72.29	500.3	1999	6	102.1	0.34	0.161	111115
351	19/6/2014	AZ	29+	s71.6.29+	flag	4	66	19842.5	31.7	0.896	294	7.1	0.993	4.65	1	3.43	24.51	25.06	24.3	400.66	368.78	15.068	21.52	49.82	71.15	500.4	2000	5	102.1	1.5	0.145	111115
352	19/6/2014	AZ	29+	s71.6.29+	flag	4	67	20123.7	42.1	0.925	509	7.2	0.983	4.65	1	3.43	24.54	25.03	24.29	650.67	607.45	15.026	21.576	49.61	71.24	500.3	2000	6	102.1	1.88	0.134	111115
353	19/6/2014	AZ	29+	s71.6.29+	flag	4	68	20391.8	45.8	0.954	745	7.26	0.967	4.65	1	3.43	24.44	24.95	24.35	900.34	852	14.966	21.567	49.7	71.61	500.5	2001	6	102.1	1.82	0.139	111115
354	19/6/2014	AZ	29+	s71.6.29+	flag	4	69	20592.9	46.2	0.948	1040	7.27	0.974	4.65	1	3.43	24.53	24.98	24.29	1201.18	1150.48	14.938	21.551	49.36	71.22	500.5	2000	6	102.1	1.55	0.123	111115
355	19/6/2014	AZ	29+	s71.6.29+	flag	4	70	20853	46.7	0.944	1330	7.3	0.98	4.65	1	3.43	24.54	25	24.29	1501.48	1448.25	14.904	21.538	49.22	71.13	500.4	1999	5	102.1	1.42	0.119	111115
356	23/6/2014	AZ	11+	s71.6.11+	flag t	4	10	4003.3	31.1	0.906	293	7.02	0.982	4.95	1	3.3	24.06	25.01	23.72	399.54	366.19	14.74	21.534	50.1	73.19	500.4	1999	11	102.2	1.74	0.0992	111115
357	23/6/2014	AZ	11+	s71.6.11+	flag t	4	11	4172.5	24.5	0.949	217	7.15	0.965	4.95	1	3.3	23.97	25	23.52	298.68	272.55	14.762	21.682	50.45	74.1	500.3	2000	10	102.2	1.41	0.0981	111115
358	23/6/2014	AZ	11+	s71.6.11+	flag t	4	12	4356.8	15.8	0.985	147	7.26	0.951	4.95	1	3.3	23.97	25.01	23.52	198.31	181.34	14.795	21.82	50.57	74.58	500.3	2000	11	102.2	1.09	0.108	111115
359	23/6/2014	AZ	11+	s71.6.11+	flag t	4	13	4508.9	6.1	1.01	79.5	7.34	0.943	4.95	1	3.3	23.97	25.01	23.52	99.62	92.91	14.794	21.901	50.57	74.86	500.3	2000	11	102.2	0.704	0.115	111115
360	23/6/2014	AZ	11+	s71.6.11+	flag t	4	14	4626.1	0.817	1.02	46.8	7.37	0.94	4.95	1	3.3	23.96	25	23.52	50.27	49.1	14.792	21.926	50.58	74.98	500.2	1999	12	102.2	0.433	0.109	111115
361	23/6/2014	AZ	11+	s71.6.11+	flag t	4	15	5043.2	31.6	1.03	299	7.36	0.934	4.95	1	3.3	23.97	24.94	23.52	399.87	365.91	14.75	21.873	50.41	74.76	500.3	2000	12	102.2	1.63	0.103	111115
362	23/6/2014	AZ	11+	s71.6.11+	flag t	4	16	5311.3	41	1.03	517	7.4	0.939	4.95	1	3.3	24.11	24.97	23.71	650.95	605.92	14.729	21.887	49.91	74.17	500.3	2001	12	102.2	2.09	0.103	111115
363	23/6/2014	AZ	11+	s71.6.11+	flag t	4	17	5615.3	43.5	1.04	754	7.4	0.934	4.95	1	3.3	24.11	24.95	23.71	900.28	851.06	14.735	21.898	49.92	74.19	500.5	2001	12	102.1	2.07	0.0959	111115
364	23/6/2014	AZ	11+	s71.6.11+	flag t	4	18	6174.6	43.4	1.03	1050	7.46	0.945	4.95	1	3.3	24.26	25.05	23.91	1201.08	1149.55	14.732	21.963	49.46	73.73	499.5	2000	12	102.1	1.91	0.102	111115
365	23/6/2014	AZ	11+	s71.6.11+	flag t	4	19	7304.7	42.8	1.06	1220	7.47	0.927	4.95	1	3.3	23.86	25.01	23.32	1376.68	1324.55	14.839	22.071	51.02	75.89	499.9	2001	12	102.1	1.86	0.0875	111125
398	17/6/2014	WT	7c	s11.1.7c	flag	4	1	6781.8	30.7	1.24	314	8.16	0.91	5.1	1	3.24	23.77	24.99	23.13	400.44	371.77	15.335	22.119	53.25	76.81	599.7	1999	20	102.6	1.62	0.137	111115
399	17/6/2014	WT	7c	s11.1.7c	flag	4	2	6970.9	24.1	1.22	232	8.15	0.917	5.1	1	3.24	23.66	25.06	22.94	299.77	277.39	15.405	22.175	53.84	77.5	600	2000	17	102.6	1.44	0.159	111115
400	17/6/2014	WT	7c	s11.1.7c	flag	4	3	7125.1	15.7	1.23	155	8.09	0.908	5.1	1	3.24	23.63	25.02	22.93	199.49	184.84	15.461	22.195	54.14	77.72	599.4	2000	18	102.6	1.17	0.167	111115
401	17/6/2014	WT	7c	s11.1.7c	flag	4	4	7273.4	5.87	1.23	82.8	8.09	0.908	5.1	1	3.24	23.64	25.06	22.93	99.84	94.21	15.529	22.255	54.36	77.91	599.9	2001	12	102.6	0.689	0.167	111115
402	17/6/2014	WT	7c	s11.1.7c	flag	4	5	7429.5	1.55	1.23	45.1	8.05	0.9	5.1	1	3.24	23.62	25.03	22.93	50.01	48.37	15.588	22.28	54.63	78.08	599.7	2000	12	102.6	0.477	0.179	111115
403	17/6/2014	WT	7c	s11.1.7c	flag	4	6	7916.7	30.2	1.21	315	7.87	0.894	5.1	1	3.24	23.6	24.97	22.93	400.54	372.35	15.681	22.228	55.02	77.99	599.4	1999	20	102.6	1.76	0.187	111115
404	17/6/2014	WT	7c	s11.1.7c	flag	4	7	8256.7	38	1.17	538	7.75	0.901	5.1	1	3.24	23.61	24.98	22.93	650.16	613.83	15.743	22.186	55.19	77.77	599.7	2001	20	102.6	2.21	0.169	111115
405	17/6/2014	WT	7c	s11.1.7c	flag	4	8	8549.9	39.7	1.13	776	7.64	0.911	5.1	1	3.24	23.49	25.02	22.73	899.79	860.44	15.795	22.149	55.79	78.23	599.8	1999	22	102.6	2.41	0.172	111115
406	17/6/2014	WT	7c	s11.1.7c	flag	4	9	9214.3	39.6	1.05	1070	7.34	0.922	5.1	1	3.24	23.29	24.98	22.54	1200.17	1159.24	15.867	21.971	56.7	78.51	599.7	2000	15	102.6	2.22	0.181	111115
407	17/6/2014	WT	7c	s11.1.7c	flag	4	10	9918.4	39.4	0.846	1320	6.73	1	5.1	1	3.24	22.95	25.11	22.15	1478.63	1436.91	15.842	21.438	57.78	78.19	600.4	2001	11	102.5	1.89	0.181	111125
408	17/6/2014	WT	4c	s11.1.4c	flag	4	11	10757.5	28.2	0.914	310	7.3	1.01	4.5	1	3.5	23.43	25.01	22.74	399.55	376.31	15.853	21.211	56.16	75.14	599.8	1999	10	102.5	1.43	0.183	111115
409	17/6/2014	WT	4c	s11.1.4c	flag	4	12	10966.6	22.2	0.889	228	7.2	1.01	4.5	1	3.5	23.43	25.03	22.73	298.76	280.55	15.878	21.168	56.24	74.98	599.7	1999	14	102.5	1.26	0.17	111115
410	17/6/2014	WT	4c	s11.1.4c	flag	4	13	11225.7	14.7	0.873	152	7.11	1.02	4.5	1	3.5	23.43	25.01	22.74	199.11	187.11	15.89	21.113	56.3	74.81	599.8	1999	16	102.5	0.972	0.171	111115
411	17/6/2014	WT	4c	s11.1.4c	flag	4	14	11406.8	5.46	0.863	81	7.05	1.02	4.5	1	3.5	23.31	24.99	22.52	99.25	94.66	15.892	21.072	56.72	75.2	599.6	1999	13	102.5	0.59	0.172	111115
412	17/6/2014	WT	4c	s11.1.4c	flag	4	15	11584	0.594	0.825	46.3	7.01	1.05	4.5	1	3.5	23.29	25.14	22.54	49.19	48.49	15.9	21.049	56.82	75.22	599.8	1999	11	102.5	0.318	0.193	111115
413	17/6/2014	WT	4c	s11.1.4c	flag	4	16	12242.5	27.6	0.796	305	6.71	1.03	4.5	1	3.5	23.1	24.95	22.35	399.49	376.86	15.918	20.845	57.52	75.32	599.8	1999	10	102.5	1.55	0.185	111115
414	17/6/2014	WT	4c	s11.1.4c	flag	4	17	12504.6	35.6	0.792	525	6.76	1.04	4.5	1	3.5	23.4	25.04	22.74	649.66	619.84	15.941	20.906	56.59	74.21	599.7	2000	12	102.5	1.79	0.15	111115
415	17/6/2014	WT	4c	s11.1.4c	flag	4	18	12733.8	37.3	0.799	766	6.74	1.03	4.5	1	3.5	23.27	25.02	22.54	901.06	868.67	16.007	20.957	57.25	74.95	600	1999	10	102.5	1.93	0.154	111115
416	17/6/2014	WT	4c	s11.1.4c	flag	4	19	13030	38	0.782	1050	6.59	1.03	4.5	1	3.5	23.12	24.99	22.34	1199.6	1165.33	16.101	20.944	58.13	75.61	599.8	2000	10	102.5	1.86	0.148	111115
417	17/6/2014	WT	4c	s11.1.4c	flag	4	20	13698.2	37.9	0.734	1340	6.35	1.05	4.5	1	3.5	22.97	25.04	22.15	1500.15	1464.73	16.232	20.893	59.14	76.12	599.8	2000	9	102.5	1.75	0.153	111115
418	19/6/2014	WT	5c	s11.1.5c	flag	4	41	12386.7	30.1	0.889	296	7.49	1.06	4.95	1	3.3	24.06	25.04	23.52	400.26	367.73	13.566	20.829	46.04	70.69	499.7	2001	14	102	1.8	0.149	111115
419	19/6/2014	WT	5c	s11.1.5c	flag	4	42	12577.9	23.3	0.905	219	7.57	1.06	4.95	1	3.3	24.06	25.05	23.51	299.28	274.13	13.538	20.885	45.95	70.89	499.6	2000	15	102	1.59	0.157	111115
420	19/6/2014	WT	5c	s11.1.5c	flag	4	43	12798	15.2	0.914	147	7.64	1.06	4.95	1	3.3	24.05	25.07	23.51	199.27	182.78	13.508	20.915	45.86	71	499.7	2000	14	102	1.2	0.158	111115
421	19/6/2014	WT	5c	s11.1.5c	flag	4	44	12948.2	5.65	0.912	79.2	7.61	1.06	4.95	1	3.3	23.91	25.04	23.31	99.19	92.89	13.496	20.88	46.21	71.5	499.5	2001	13	102	0.76	0.157	111115
422	19/6/2014	WT	5c	s11.1.5c	flag	4	45	13099.4	0.798	0.911	45.1	7.6	1.06	4.95	1	3.3	23.89	25.03	23.32	48.79	47.64	13.484	20.861	46.24	71.53	499.4	2000	10	102	0.42	0.167	111115
423	19/6/2014	WT	5c	s11.1.5c	flag	4	46	13541.5	30.4	0.902	296	7.57	1.06	4.95	1	3.3	24.04	25	23.51	400.65	367.78	13.414	20.761	45.58	70.54	499.5	2000	8	102	1.65	0.166	111115
424	19/6/2014	WT	5c	s11.1.5c	flag	4	47	13759.7	40	0.904	509	7.57	1.06	4.95	1	3.3	24.05	24.96	23.51	650.27	606.15	13.368	20.7	45.41	70.32	500.4	2001	10	102	2.22	0.145	111115
425	19/6/2014	WT	5c	s11.1.5c	flag	4	48	14094.7	42.7	0.914	747	7.66	1.06	4.95	1	3.3	24.2	24.99	23.71	901.26	852.55	13.311	20.729	44.8	69.78	500.3	2000	9	102	2.22	0.147	111115
426	19/6/2014	WT	5c	s11.1.5c	flag	4	49	14333.9	42.7	0.905	1040	7.63	1.07	4.95	1	3.3	24.18	24.96	23.7	1199.02	1148.1	13.248	20.638	44.64	69.54	500.5	2001	7	102	2.14	0.148	111115
427	19/6/2014	WT	5c	s11.1.5c	flag	4	50	14635.2	42.8	0.878	1330	7.53	1.08	4.95	1	3.3	24.16	24.94	23.71	1500.6	1447.49	13.169	20.47	44.43	69.06	500.4	2000	8	102	1.82	0.136	111115
428	23/6/2014	WT	3c	s11.1.3c	flag	3	20	9586.1	26.9	0.688	292	6.1	1.07	4.95	1	3.3	24.07	24.83	23.52	399.74	370.87	14.458	20.377	49.08	69.18	499.7	1945	11	102.1	1.62	0.131	111115
429	23/6/2014	WT	3c	s11.1.3c	flag	3	21	9759.4	21.6	0.774	218	6.58	1.04	4.95	1	3.3	24.22	24.98	23.72	299.27	276.02	14.503	20.892	48.78	70.27	499.5	1999	10	102.1	1.46	0.125	111115
430	23/6/2014	WT	3c	s11.1.3c	flag	3	22	9959.6	14.2	0.832	148	6.77	1.01	4.95	1	3.3	24.1	24.95	23.51	199.45	184.15	14.564	21.134	49.35	71.61	499.5	2001	12	102.1	1.09	0.118	111115
431	23/6/2014	WT	3c	s11.1.3c	flag	3	23	10103.8	5.43	0.87	80.6	6.93	1	4.95	1	3.3	24.25	24.99	23.71	100.23	94.21	14.599	21.317	49.04	71.6	499.7	1999	12	102.1	0.673	0.126	111115
432	23/6/2014	WT	3c	s11.1.3c	flag	3	24	10217	0.637	0.881	47.4	6.99	0.999	4.95	1	3.3	24.24	25.03	23.71	50.56	49.58	14.637	21.419	49.17	71.95	499.4	2001	12	102.1	0.41	0.132	111115
433	23/6/2014	WT	3c	s11.1.3c	flag	3	25	10585.1	29.5	0.888	298	6.98	0.991	4.95	1	3.3	24.18	25.02	23.46	400.11	368.34	14.72	21.482	49.63	72.43	499.7	2001	11	102.1	1.74	0.118	111115
434	23/6/2014	WT	3c	s11.1.3c	flag	3	26	10821.2	40.8	0.911	508	6.98	0.973	4.95	1	3.3	24.13	24.95	23.51	649.88	605.26	14.752	21.524	49.9	72.8	499.5	2000	12	102.1	2.12	0.121	111115
435	23/6/2014	WT	3c	s11.1.3c	flag	3	27	11142.4	44.7	0.916	741	7.07	0.979	4.95	1	3.3	24.27	25.03	23.71	900.38	850.12	14.759	21.609	49.49	72.46	499.7	2000	10	102.1	2.1	0.12	111115
436	23/6/2014	WT	3c	s11.1.3c	flag	3	28	11430.5	44.7	0.908	1030	7.01	0.978	4.95	1	3.3	24.13	25	23.52	1199.54	1147.31	14.781	21.577	50	72.98	499.6	2000	12	102.1	2.28	0.11	111115
437	23/6/2014	WT	3c	s11.1.3c	flag	3	29	11870.6	45.3	0.891	1320	7	0.991	4.95	1	3.3	24.25	25.07	23.57	1500.91	1445.95	14.786	21.572	49.63	72.41	499.5	2000	12	102.1	1.74	0.114	111115
