# Supplementary material for: Increased SBPase activity improves photosynthesis and grain yield in wheat grown in greenhouse conditions
Source: Philos Trans R Soc Lond B Biol Sci. 2017 Aug 14;372(1730):20160384. doi: 10.1098/rstb.2016.0384 (PMC5566882; doi:10.1098/rstb.2016.0384)
Supplement: Data file 4 [file rstb20160384supp5.csv]

	name	line	Vcmax	J
1	s31.19.1	WT	88.49219341	182.1251874
2	s36.26.1	WT	81.58483921	174.0514502
4	s31.1.6	WT	78.04917763	168.52072
5	s36.26.2	WT	88.72940238	186.5455189
7	s35b.2.3.3	Sox23	101.2967533	201.0860025
8	s35b.2.5.4	Sox23	97.86200375	179.0168168
9	s35b.2.7.4	Sox23	77.5760435	166.2050778
10	s35b.3.8.3	Sox23	96.08844047	187.0003931
11	s35b.3.14.2	Sox23	92.97381554	181.2938553
12	s35b.3.14.4	Sox23	92.20878015	180.6846801
13	s35b.2.5.3	Sox23	100.8664718	223.3872593
14	s35b.3.9.1	Sox23	74.43256803	152.2200307
15	s78.9.4	Sox42	103.3173141	201.3791579
16	s78.11.7	Sox42	79.7690959	172.1356825
18	s78.9.6	Sox44	107.0108616	248.8731104
19	s78.11.3	Sox42	106.9586086	233.3486497
20	s78.14.3	Sox44	87.35204113	178.961356
21	s78.16.7	Sox44	109.8377354	241.0620573
